# Supplementary material for: Evaluating Ultrasonicator Performance for Cyanobacteria Management at Freshwater Sources
Source: MDPI journal article supplement (doi:10.3390/toxins15030186), 2023-03-01
Supplement: s1 [file s1]

# Evaluating Ultrasonicator Performance for Cyanobacteria Management at Freshwater Sources

Liam Vaughan, Dean Barnett, Elisa Bourke, Hamish Burrows, Fiona Robertson, Brad Smith,  
Jenna Cashmore, Michael Welk, Michael Burch and Arash Zamyadi

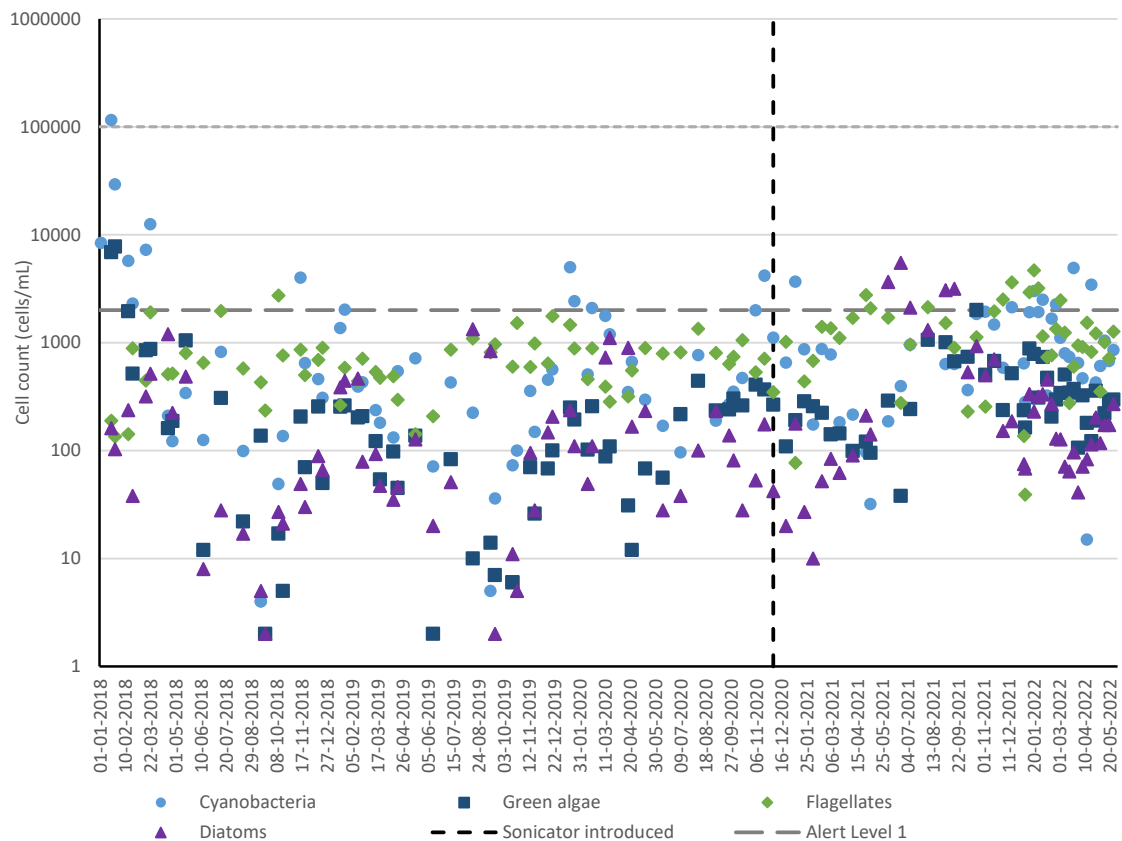

Figure S1. Reservoir C all algal groups timeseries using the reservoir water dataset.

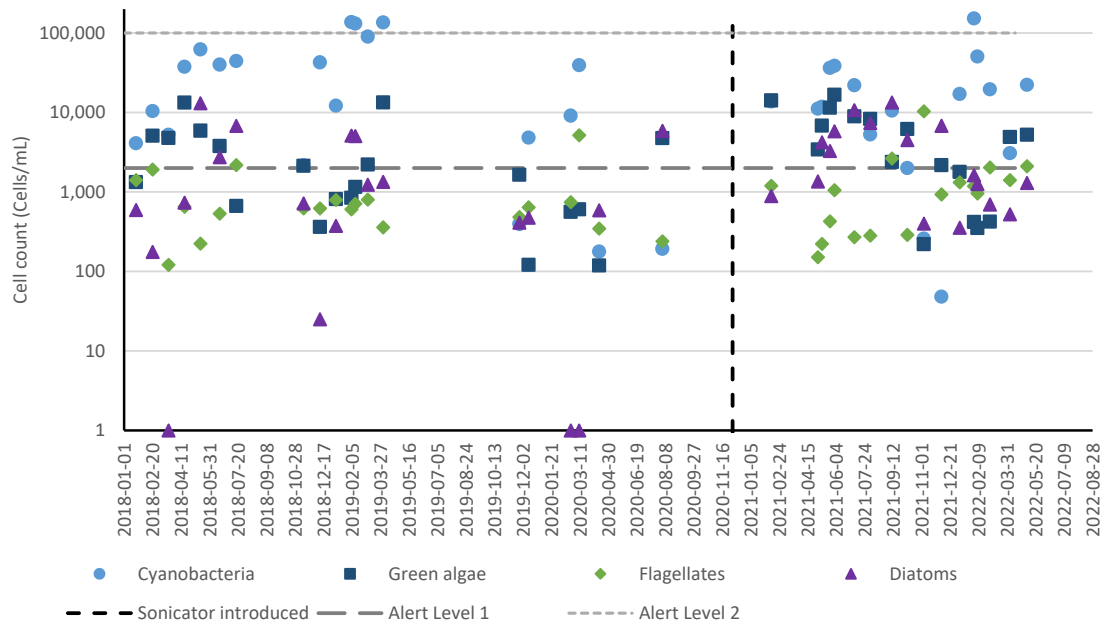

Figure S2. Reservoir B all algal groups timeseries.

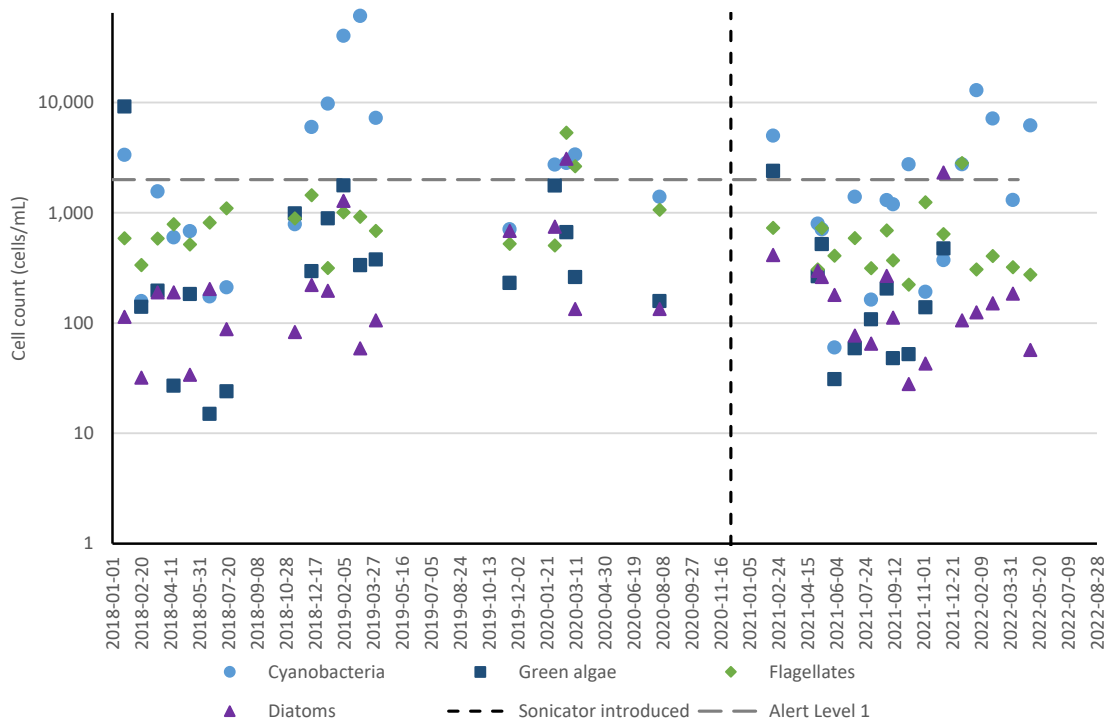

Figure S3. Reservoir A all algal groups timeseries.

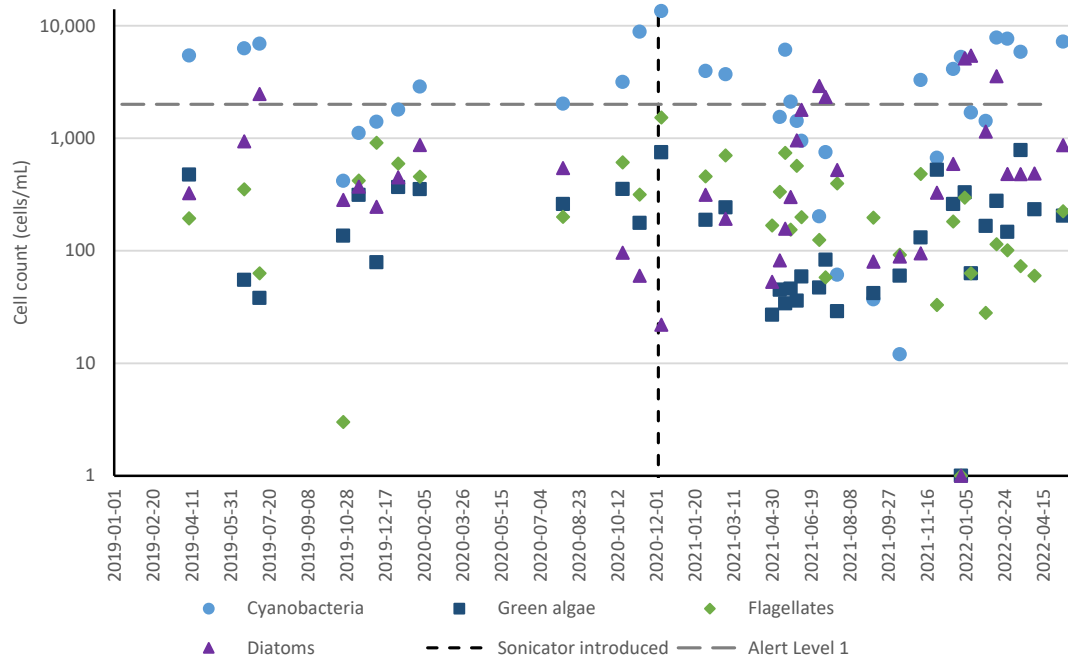

**Figure S4.** Reservoir D all algal groups timeseries.

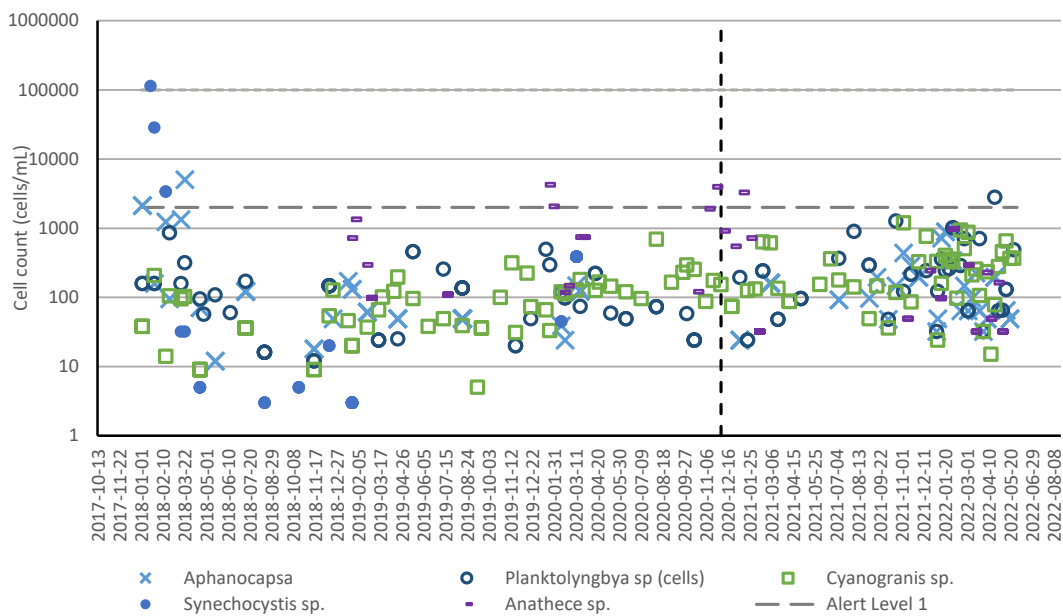

**Figure S5.** Reservoir C cyanobacteria cell count (dominant species) timeseries using the reservoir water dataset. Top four dominant species determined based upon cell count averages across entire dataset.

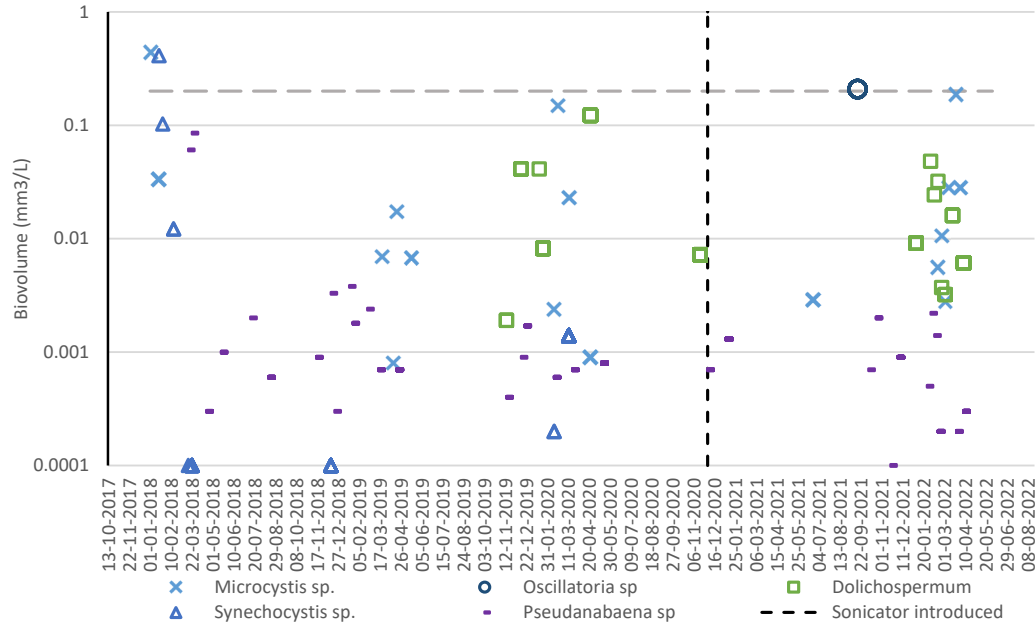

**Figure S6.** Reservoir C cyanobacteria biovolume (dominant species) timeseries using the reservoir water dataset. Top four dominant species determined based upon biovolume averages across entire dataset.

**Table S1.** Log-changes between pre- and post-sonication populations, and p-values from each t-test.

| Location    | Data source     | Season    | n (pre) | n (post) |              | Cyano (BV) | Cyano (CC) | Green Algae | Flagellates | Diatoms |
|-------------|-----------------|-----------|---------|----------|--------------|------------|------------|-------------|-------------|---------|
| Reservoir C | DWTP intake     | Bloom     | 83      | 47       | Change       | -0.421     | -0.433     | 0.667       | 0.847       | 0.176   |
|             |                 |           |         |          | Significance | 0.121      | 0.019      | 0.001       | 0.000       | 0.448   |
|             |                 | Non-bloom | 11      | 6        | Change       | 0.761      | 0.640      | 2.385       | 0.634       | 3.773   |
|             |                 |           |         |          | Significance | 0.33       | 0.272      | 0.008       | 0.009       | 0.000   |
|             | Reservoir water | Bloom     | 42      | 33       | Change       | -0.178     | -0.108     | 0.921       | 0.576       | 0.314   |
|             |                 |           |         |          | Significance | 0.656      | 0.747      | 0.005       | 0.032       | 0.274   |
| Reservoir B | Reservoir water | Bloom     | 16      | 9        | Change       | -1.467     | -0.858     | 0.089       | 0.651       | 1.787   |
|             |                 |           |         |          | Significance | 0.728      | 0.842      | 0.195       | 0.926       | 0.485   |
|             |                 | Non-bloom | 4       | 8        | Change       | 0.792      | 0.303      | 0.839       | 0.063       | -0.325  |
|             |                 |           |         |          | Significance | 0.728      | 0.842      | 0.195       | 0.926       | 0.485   |
| Reservoir A | Reservoir water | Bloom     | 14      | 8        | Change       | 0.042      | -0.407     | -0.024      | -0.353      | -0.338  |
|             |                 |           |         |          | Significance | 0.948      | 0.552      | 0.968       | 0.346       | 0.575   |
|             |                 | Non-bloom | 4       | 8        | Change       | -0.946     | 0.513      | 0.804       | -0.665      | 0.361   |
|             |                 |           |         |          | Significance | 0.416      | 0.485      | 0.322       | 0.021       | 0.459   |
| Reservoir D | Reservoir water | Bloom     | 8       | 16       | Change       | 0.498      | 0.457      | -0.550      | -0.773      | 0.089   |
|             |                 |           |         |          | Significance | 0.492      | 0.420      | 0.240       | 0.335       | 0.887   |
|             |                 | Non-bloom | 3       | 10       | Change       | -2.899     | -1.765     | -0.450      | 0.365       | -0.718  |
|             |                 |           |         |          | Significance | 0.017      | 0.029      | 0.530       | 0.284       | 0.017   |
